# Supplementary material for: Identification of ferroptosis-related genes and pathways in diabetic kidney disease using bioinformatics analysis
Source: PubMed Central journal article supplement (PMC9803720; doi:10.1038/s41598-022-26495-2), 2022-12-30

Supplementary figure 1:

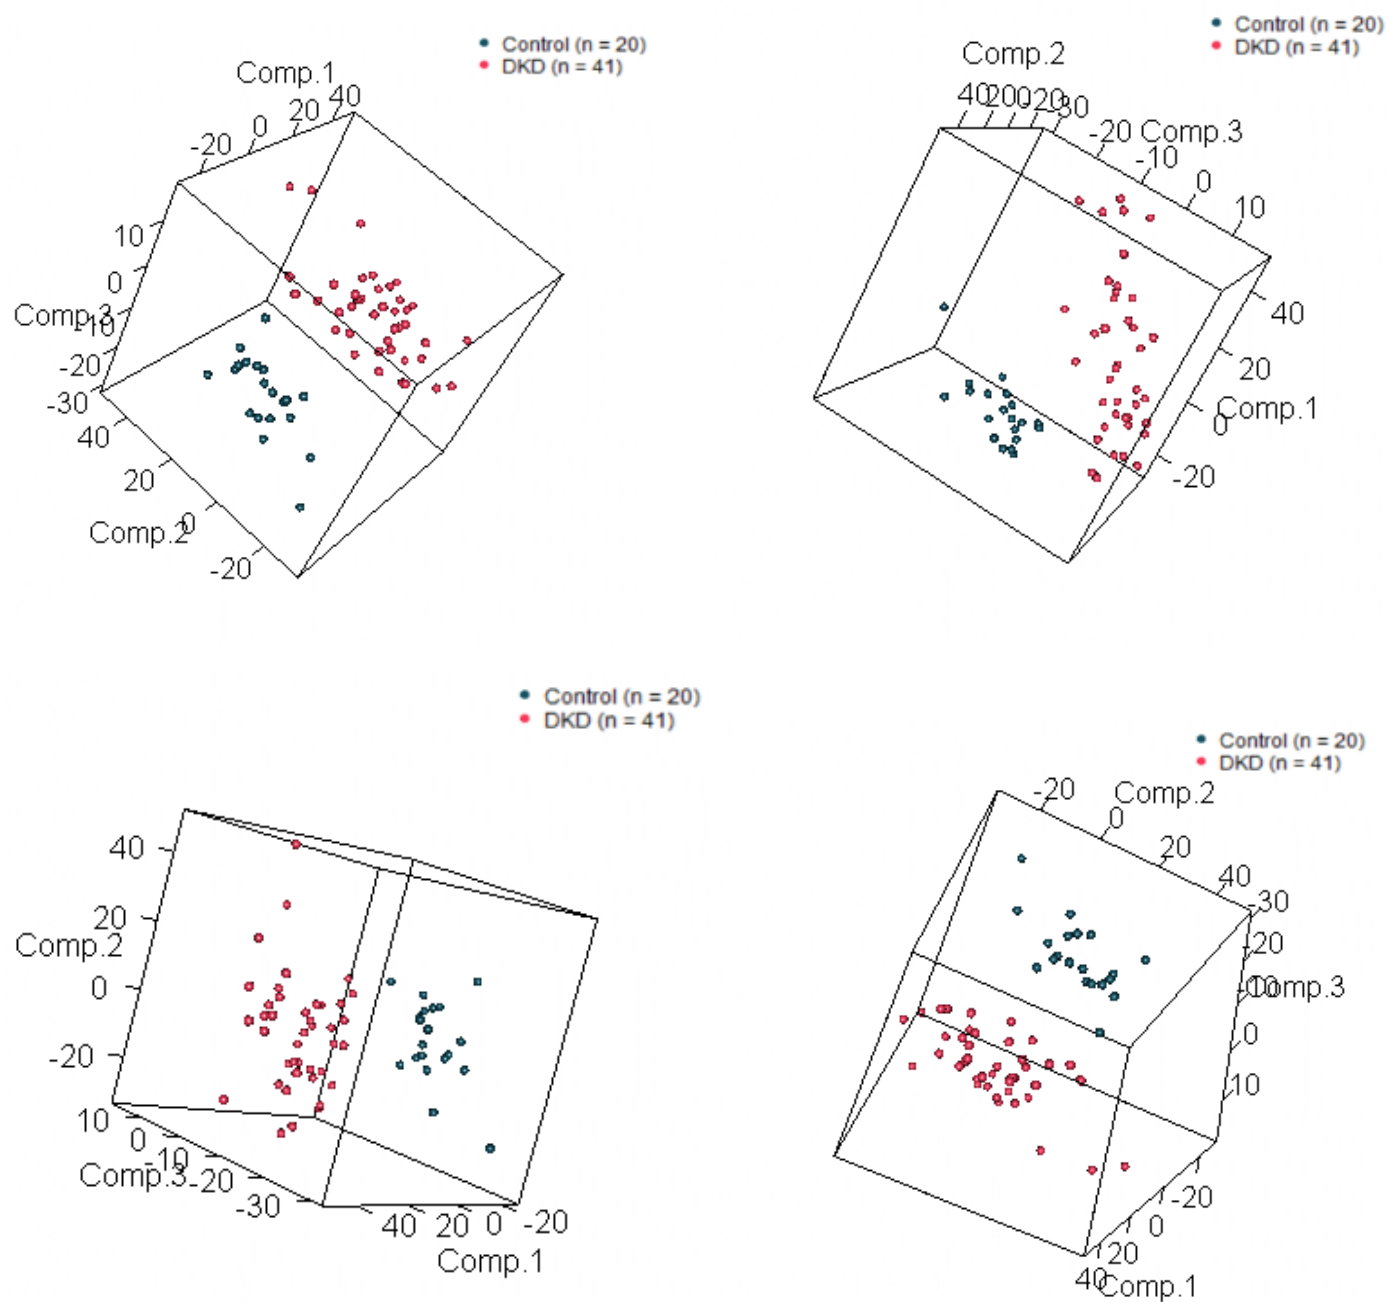

Supplementary figure 2:

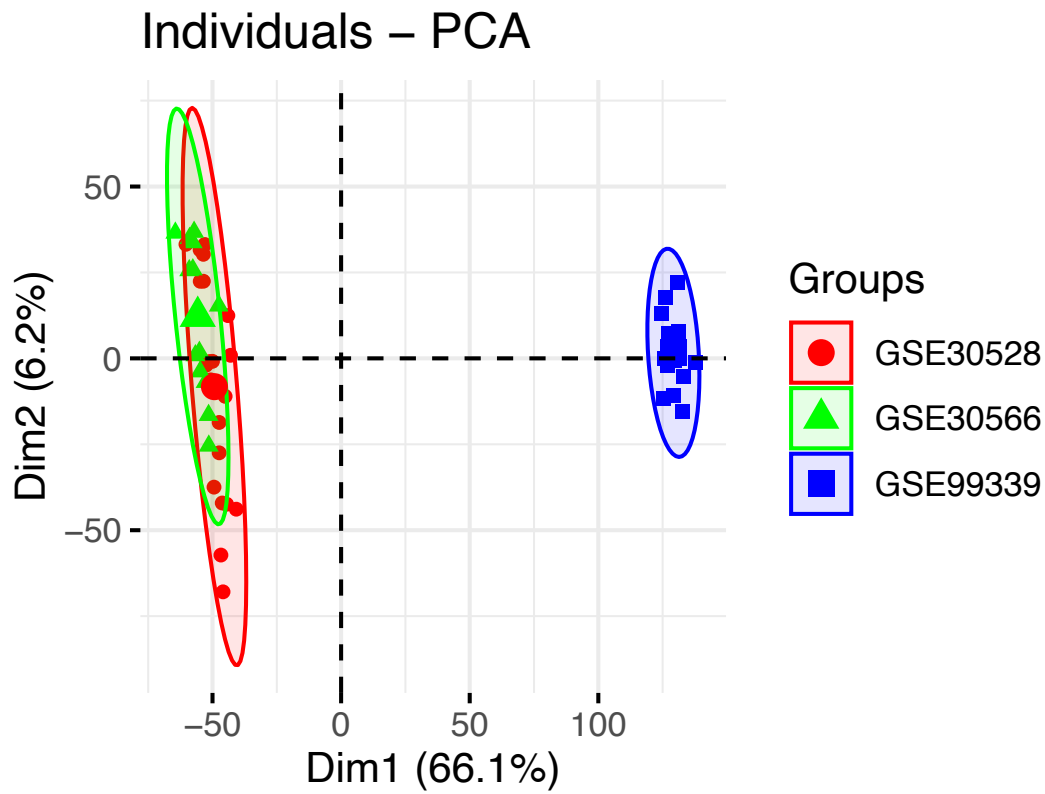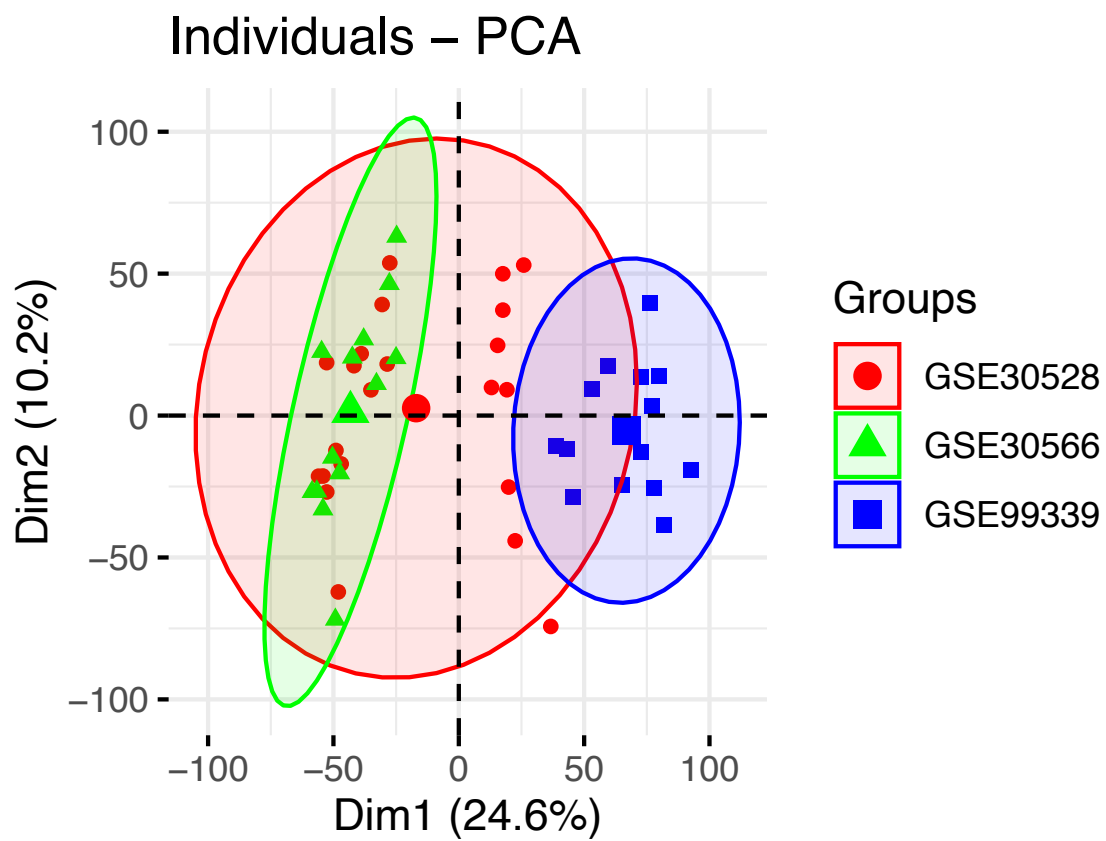

Supplementary figure 3:

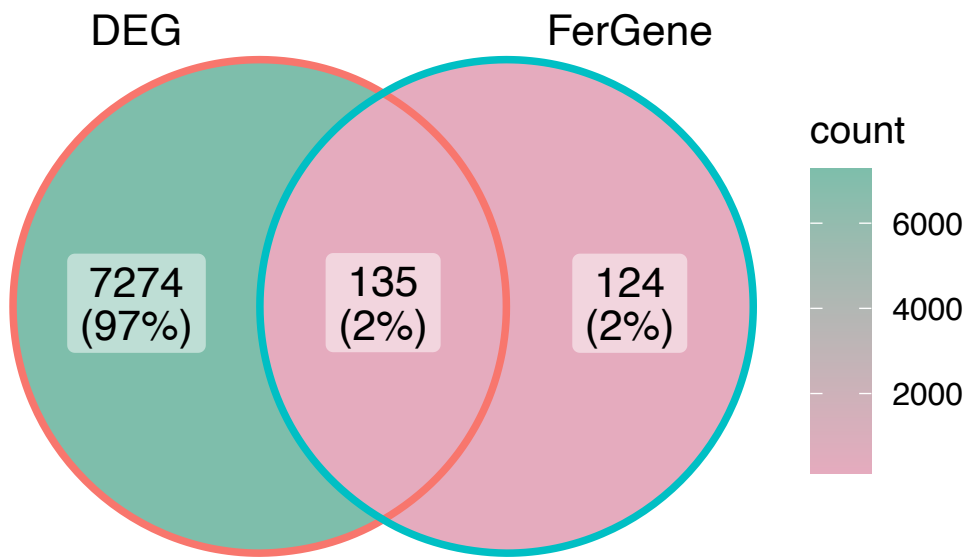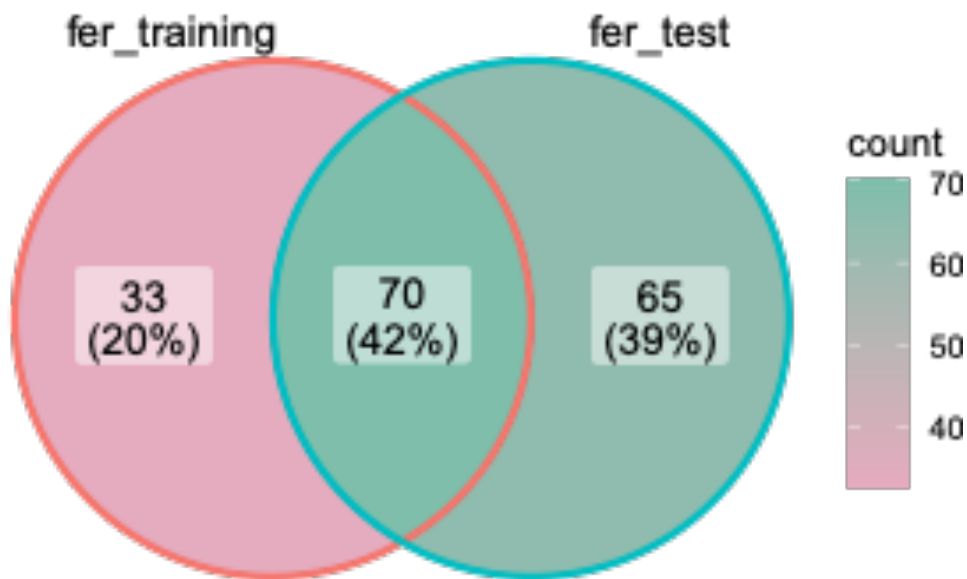

Supplementary figure 4:

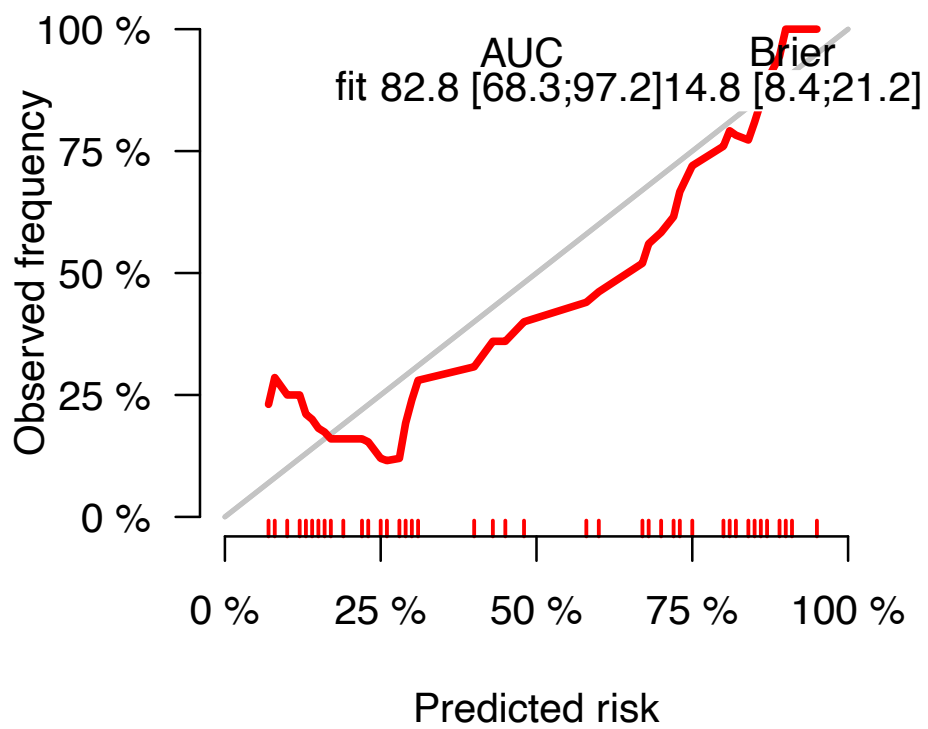

Supplementary figure 5:

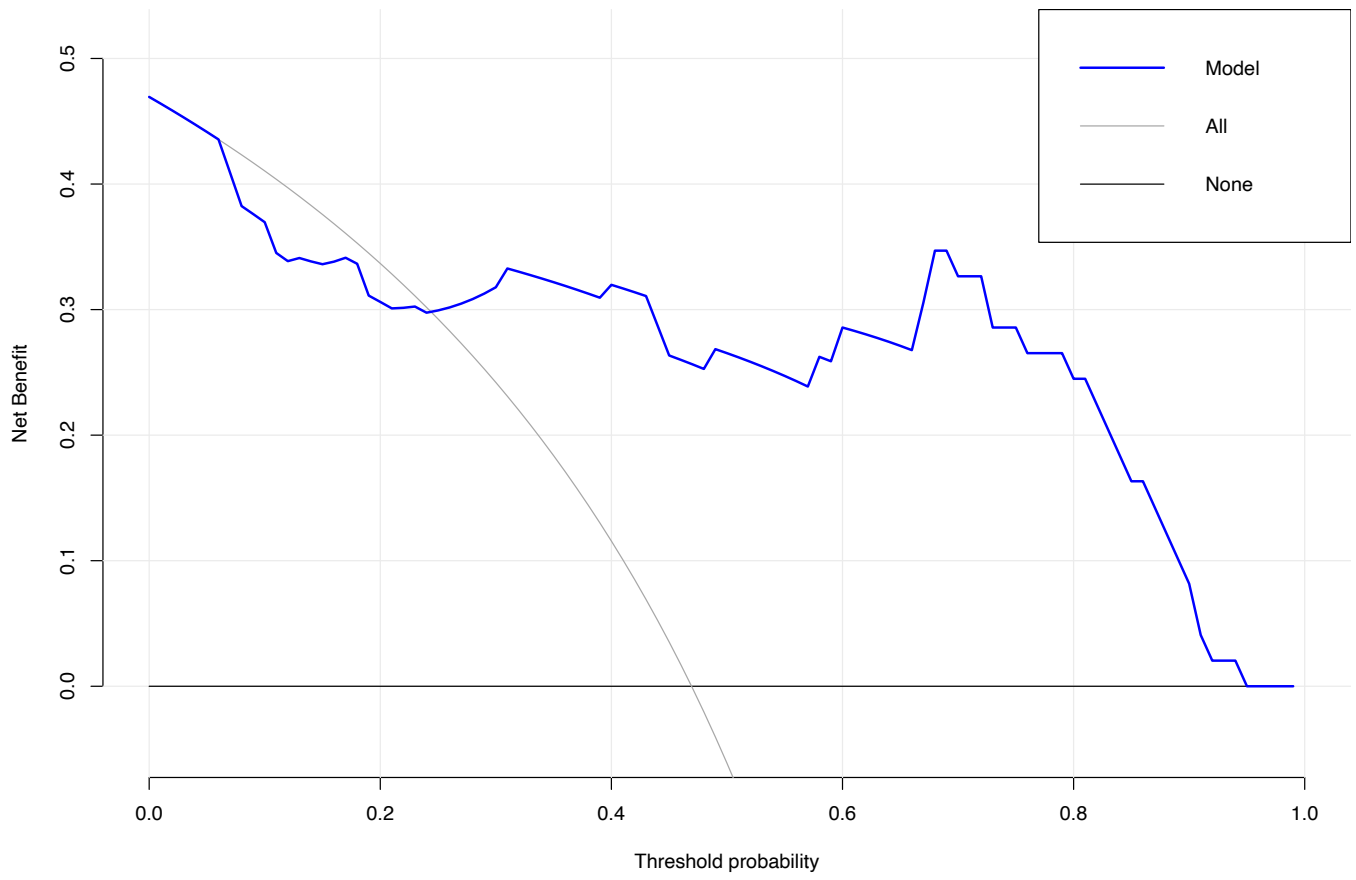

Supplementary figure 6:

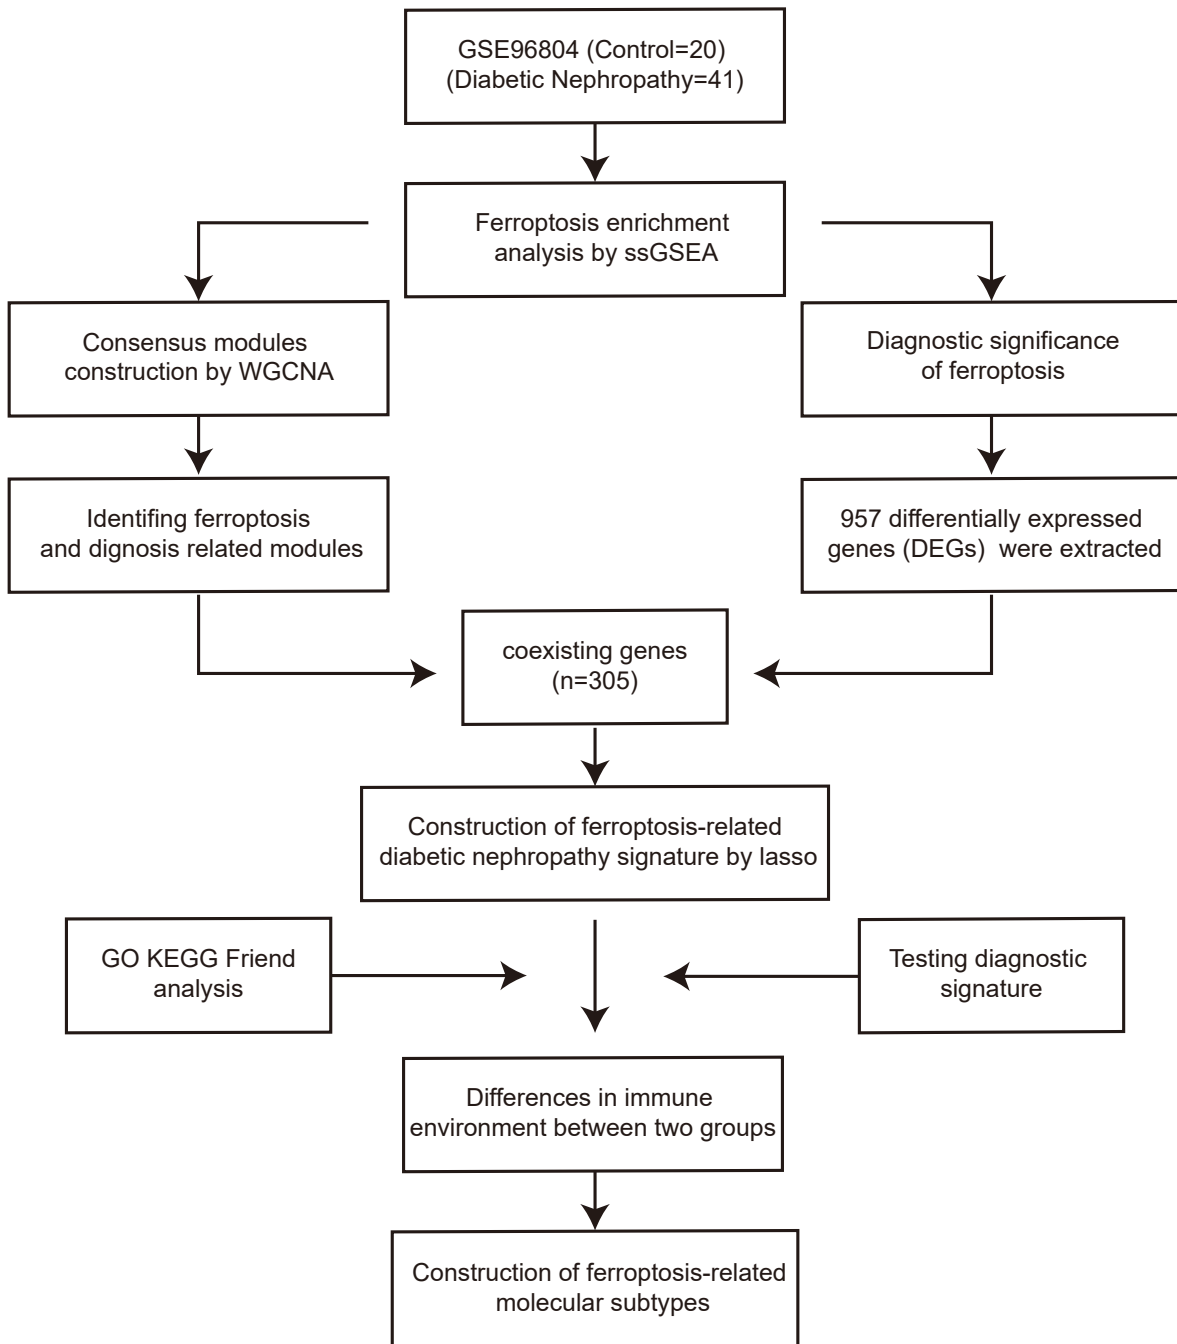

Supplement: 41598_2022_26495_MOESM1_ESM.pdf [file 41598_2022_26495_MOESM1_ESM.pdf]
