# Supplementary material for: Identification of ferroptosis-related genes and pathways in diabetic kidney disease using bioinformatics analysis
Source: PubMed Central journal article supplement (PMC9803720; doi:10.1038/s41598-022-26495-2), 2022-12-30
Supplement: 41598_2022_26495_MOESM2_ESM.pdf [file 41598_2022_26495_MOESM2_ESM.pdf]

Supplementary tables

Table S1 Pathway enrichment analysis by GSEA analysis

| <b>Description</b>                                           | <b>logFC</b> | <b>adjust-p</b> |
|--------------------------------------------------------------|--------------|-----------------|
| STANHILL_HRAS_TRANSFORMATION_UP                              | -1.15777     | 2.26E-23        |
| GO_TRANSCRIPTION_FACTOR_AP_1_COMPLEX                         | -1.15065     | 1.18E-18        |
| GSE7596_AKT_TRANSD_VS_CTRL_CD4_TCONV_WITH_T<br>GFB_UP        | 0.492108     | 1.26E-14        |
| GO_EPIBOLY                                                   | 0.612853     | 2.88E-12        |
| HUMMERICH_MALIGNANT_SKIN_TUMOR_DN                            | -0.63053     | 6.15E-12        |
| GO_PML_BODY_ORGANIZATION                                     | 0.763429     | 6.15E-12        |
| GALE_APL_WITH_FLT3_MUTATED_UP                                | 0.484234     | 6.15E-12        |
| GSE34156_UNTREATED_VS_6H_NOD2_LIGAND_TREATE<br>D_MONOCYTE_UP | -0.42947     | 6.15E-12        |
| GSE39820_CTRL_VS_TGFBETA3_IL6_IL23A_CD4_TCELL_<br>UP         | 0.441666     | 7.36E-12        |
| GO_PORIN_ACTIVITY                                            | -1.17032     | 1.06E-11        |

Table S2 GSEA enrichment analysis of GO function of DEGs in DKD

| <b>ID</b>  | <b>Description</b>                       | <b>NES</b> | <b>adjust-p</b> |
|------------|------------------------------------------|------------|-----------------|
| GO:0062023 | collagen-containing extracellular matrix | 2.316283   | 0.02322         |
| GO:0031012 | extracellular matrix                     | 2.233551   | 0.02322         |
| GO:0005788 | endoplasmic reticulum lumen              | 1.833626   | 0.02322         |
| GO:0005925 | focal adhesion                           | 1.767585   | 0.02322         |
| GO:0030055 | cell-substrate junction                  | 1.755424   | 0.02322         |
| GO:0005681 | spliceosomal complex                     | 1.635317   | 0.02322         |
| GO:0000781 | chromosome, telomeric region             | 1.631534   | 0.02322         |
| GO:0098687 | chromosomal region                       | 1.538351   | 0.02322         |
| GO:0016607 | nuclear speck                            | 1.511965   | 0.02322         |
| GO:0030426 | growth cone                              | 1.511335   | 0.029127        |
| GO:0030427 | site of polarized growth                 | 1.507831   | 0.029127        |
| GO:0034399 | nuclear periphery                        | 1.490349   | 0.044337        |
| GO:0000793 | condensed chromosome                     | 1.48673    | 0.029127        |
| GO:0030496 | midbody                                  | 1.486664   | 0.044337        |
| GO:0000775 | chromosome, centromeric region           | 1.474894   | 0.044337        |
| GO:0030027 | lamellipodium                            | 1.385593   | 0.04938         |
| GO:0031252 | cell leading edge                        | 1.373402   | 0.030283        |
| GO:0015629 | actin cytoskeleton                       | 1.363185   | 0.02322         |
| GO:0005911 | cell-cell junction                       | 1.308235   | 0.046035        |
| GO:0000228 | nuclear chromosome                       | 1.301941   | 0.031136        |
| GO:0098797 | plasma membrane protein complex          | 1.259755   | 0.046516        |
| GO:0031253 | cell projection membrane                 | -1.3663    | 0.04449         |
| GO:0045177 | apical part of cell                      | -1.46694   | 0.02322         |
| GO:0019867 | outer membrane                           | -1.52087   | 0.042711        |
| GO:0016324 | apical plasma membrane                   | -1.53072   | 0.02322         |
| GO:0031968 | organelle outer membrane                 | -1.54122   | 0.042711        |
| GO:0005741 | mitochondrial outer membrane             | -1.65908   | 0.02322         |

---

|            |                                         |          |         |
|------------|-----------------------------------------|----------|---------|
| GO:0098862 | cluster of actin-based cell projections | -1.71711 | 0.02322 |
| GO:0019866 | organelle inner membrane                | -1.86844 | 0.02322 |
| GO:0031966 | mitochondrial membrane                  | -1.89095 | 0.02322 |
| GO:0005740 | mitochondrial envelope                  | -1.90933 | 0.02322 |
| GO:0098798 | mitochondrial protein complex           | -1.94669 | 0.02322 |
| GO:0005743 | mitochondrial inner membrane            | -1.96784 | 0.02322 |
| GO:0005759 | mitochondrial matrix                    | -2.30586 | 0.02322 |

---

Table S3 GSEA enrichment analysis of KEGG pathway of DEGs in diabetic nephropathy

| <b>ID</b> | <b>Description</b>                                | <b>NES</b> | <b>adjust-p</b> |
|-----------|---------------------------------------------------|------------|-----------------|
| hsa04510  | Focal adhesion                                    | 2.013966   | 0.010433        |
| hsa05206  | MicroRNAs in cancer                               | 1.854934   | 0.010433        |
| hsa05205  | Proteoglycans in cancer                           | 1.728944   | 0.010433        |
| hsa04151  | PI3K-Akt signaling pathway                        | 1.716662   | 0.010433        |
| hsa05165  | Human papillomavirus infection                    | 1.706475   | 0.010433        |
| hsa05168  | Herpes simplex virus 1 infection                  | 1.597501   | 0.010433        |
| hsa05164  | Influenza A                                       | 1.566219   | 0.010433        |
| hsa04060  | Cytokine-cytokine receptor interaction            | 1.549929   | 0.010433        |
| hsa04621  | NOD-like receptor signaling pathway               | 1.534997   | 0.010433        |
| hsa04810  | Regulation of actin cytoskeleton                  | 1.51966    | 0.016389        |
| hsa05169  | Epstein-Barr virus infection                      | 1.516306   | 0.010433        |
| hsa05171  | Coronavirus disease - COVID-19                    | 1.481894   | 0.010433        |
| hsa05131  | Shigellosis                                       | 1.471281   | 0.021177        |
| hsa05160  | Hepatitis C                                       | 1.451674   | 0.015811        |
| hsa05203  | Viral carcinogenesis                              | 1.445467   | 0.010433        |
| hsa04218  | Cellular senescence                               | 1.424482   | 0.015811        |
| hsa04062  | Chemokine signaling pathway                       | 1.420955   | 0.010433        |
| hsa04310  | Wnt signaling pathway                             | 1.392238   | 0.030614        |
| hsa05202  | Transcriptional misregulation in cancer           | 1.36693    | 0.020726        |
| hsa05200  | Pathways in cancer                                | 1.268244   | 0.033315        |
| hsa04714  | Thermogenesis                                     | -1.48649   | 0.020726        |
| hsa04932  | Non-alcoholic fatty liver disease                 | -1.60892   | 0.010433        |
| hsa05208  | Chemical carcinogenesis - reactive oxygen species | -1.79856   | 0.010433        |

Table S4 GO functional analysis of diagnostic markers

| <b>ID</b>  | <b>Description</b>                                                                              | <b>adjust-p</b> |
|------------|-------------------------------------------------------------------------------------------------|-----------------|
| GO:0035976 | transcription factor AP-1 complex                                                               | 0.03082         |
| GO:0046332 | SMAD binding                                                                                    | 0.024383        |
| GO:0008330 | protein tyrosine/threonine phosphatase activity                                                 | 0.024383        |
| GO:0047045 | testosterone 17-beta-dehydrogenase (NADP+) activity                                             | 0.024383        |
| GO:0008186 | RNA-dependent ATPase activity                                                                   | 0.024383        |
| GO:0050733 | RS domain binding                                                                               | 0.024383        |
| GO:0070180 | large ribosomal subunit rRNA binding                                                            | 0.024383        |
| GO:1990247 | N6-methyladenosine-containing RNA binding                                                       | 0.024383        |
| GO:0019870 | potassium channel inhibitor activity                                                            | 0.02742         |
| GO:0004303 | estradiol 17-beta-dehydrogenase activity                                                        | 0.029778        |
| GO:0017017 | MAP kinase tyrosine/serine/threonine phosphatase activity                                       | 0.031661        |
| GO:0033549 | MAP kinase phosphatase activity                                                                 | 0.033197        |
| GO:0034458 | 3'-5' RNA helicase activity                                                                     | 0.038515        |
| GO:0070412 | R-SMAD binding                                                                                  | 0.043003        |
| GO:0051019 | mitogen-activated protein kinase binding                                                        | 0.045114        |
| GO:0033764 | steroid dehydrogenase activity, acting on the CH-OH group of donors,<br>NAD or NADP as acceptor | 0.046937        |
| GO:0000979 | RNA polymerase II core promoter sequence-specific DNA binding                                   | 0.04845         |
| GO:0016229 | steroid dehydrogenase activity                                                                  | 0.04845         |
| GO:0008200 | ion channel inhibitor activity                                                                  | 0.04845         |
| GO:0016248 | channel inhibitor activity                                                                      | 0.04845         |
| GO:0001784 | phosphotyrosine residue binding                                                                 | 0.04845         |
| GO:0001046 | core promoter sequence-specific DNA binding                                                     | 0.049502        |
| GO:0008138 | protein tyrosine/serine/threonine phosphatase activity                                          | 0.049502        |

Table S5 KEGG analysis of diagnostic markers

| <b>ID</b> | <b>Description</b>                     | <b>adjust-p</b> |
|-----------|----------------------------------------|-----------------|
| hsa04010  | MAPK signaling pathway                 | 0.022311        |
| hsa05418  | Fluid shear stress and atherosclerosis | 0.070435        |
